# Supplementary material for: A Lagrangian Perspective on the Lifecycle and Cloud Radiative Effect of Deep Convective Clouds Over Africa
Source: Copernicus journal article supplement (doi:10.5194/egusphere-2023-2059), 2023-10-05
Supplement: Supplementary file [file egusphere-2023-2059-AC3-supplement.pdf]

There have been several minor changes made to the manuscript to address issues not raised by either reviewer. These are as follows:

1. Recalculation of CRE bias using updated CERES EBAF Ed 4.2 data after an error in the fluxes over certain scenes was corrected. The new bias is calculated as -1.87 (new), -2.02 (SW) and +0.15 (LW). This results in a small change to the net anvil CRE calculate at  $-0.94 \pm 0.91 \text{Wm}^{-2}$ . This change does not affect the findings of the paper overall.
2. Update of the figures to better meet ACP guidelines.
3. Addition of a supplementary figures file to show greater detail on some technical aspects of the article.
